# Supplementary material for: Clinical Features of Patients with Home Isolation Sars-Cov-2 Infection: A Multicenter Retrospective Study in Southern Italy
Source: MDPI journal article supplement (doi:10.3390/life11040347), 2021-04-16
Supplement: s1 [file s1]

# Clinical Features of Patients with Home Isolation Sars-Cov-2 Infection: A Multicenter Retrospective Study in Southern Italy

Table S1. Demographic and clinical characteristics of patients in home isolation according to the presence of symptoms.

|                                                                           | Asymptomatic subjects | Symptomatic patients | P        |
|---------------------------------------------------------------------------|-----------------------|----------------------|----------|
| N° of subjects                                                            | 13                    | 64                   |          |
| N° (%) of males                                                           | 5 (38)                | 37 (58)              | .201436. |
| Age, years, median (IQR)                                                  | 46 (22.5)             | 45 (18.75)           | .933855. |
| N° (%) of patients in different age classes, (years)                      |                       |                      |          |
| 18-29                                                                     | 2 (15%)               | 10 (16)              | .982619. |
| 30-39                                                                     | 2 (15%)               | 12 (19)              | .774251. |
| 40-49                                                                     | 4 (31%)               | 19 (30)              | .938075. |
| 50-59                                                                     | 4 (31%)               | 9 (14)               | .142646. |
| 60-69                                                                     | 1 (8%)                | 12 (19)              | .331893. |
| 70-80                                                                     | 0                     | 1 (1)                |          |
| >80                                                                       | 0                     | 1 (1)                |          |
| Days of enrolment after onset of symptoms, median (range)                 | //                    | 5                    |          |
| N° (%) of healthcare workers                                              | 5 (39)                | 24 (38)              | .9003    |
| N° (%) of subjects with contact with suspected or confirmed COVID-19 case | 10 (77)               | 20 (31)              | .0021    |
| Charlson comorbidity index, median (IQR)                                  | 1                     | 0 (2)                | .613598. |
| N° (%) of subjects with underlying chronic disease                        | 6 (46)                | 24/62 (38)           | .182117. |
| With hypertension                                                         | 2/13 (15)             | 18/62 (28)           | .311673. |
| With cardio-vascular disease                                              | 1/13 (8)              | 6/62 (9)             | .822985. |
| With diabetes                                                             | 2/13 (15)             | 1/62 (1)             | .02123.  |
| With malignancy                                                           | 0                     | 0                    |          |
| With chronic kidney disease                                               | 0                     | 3/62 (5)             |          |
| With chronic obstructive pulmonary disease                                | 1/13 (8)              | 2/62 (3)             | .454941. |
| With liver cirrhosis                                                      | 0                     | 0                    |          |
| N° (%) of asymptomatic subjects                                           | 13 (100)              | 0                    |          |
| N° (%) of subjects with                                                   |                       |                      |          |
| fever                                                                     | //                    | 43/63 (56)           |          |
| cough                                                                     | //                    | 35/63 (45)           |          |
| dyspnea                                                                   | //                    | 3/63 (4)             |          |
| hypo ageusia                                                              | //                    | 27/63 (35)           |          |
| hypo-anosmia                                                              | //                    | 26/63 (34)           |          |
| diarrhea                                                                  | //                    | 6/63 (8)             |          |
| cutaneous lesions                                                         | //                    | 2/63 (2)             |          |

**Table S2.** Demographic and clinical characteristics of the hospitalized patients according to the COVID-19 severity.

|                                                                           | Hospitalized patients |                 | p         |
|---------------------------------------------------------------------------|-----------------------|-----------------|-----------|
|                                                                           | Non-severe COVID-19   | Severe COVID-19 |           |
| N° of subjects                                                            | 196                   | 132             |           |
| N° (%) of males                                                           | 127 (65)              | 86 (65)         | .947229.  |
| Age, years, median (IQR)                                                  | 60 (22)               | 68 (22)         | < .00001. |
| N° (%) of patients in different age classes, (years)                      |                       |                 |           |
| 18-29                                                                     | 7 (4)                 | 2 (2)           | .263594.  |
| 30-39                                                                     | 22 (11)               | 2 (2)           | .000929.  |
| 40-49                                                                     | 32 (16)               | 8 (6)           | .005332.  |
| 50-59                                                                     | 36 (18)               | 26 (20)         | .76295.   |
| 60-69                                                                     | 51 (26)               | 31 (23)         | .603024.  |
| 70-80                                                                     | 36 (19)               | 36 (27)         | .056029.  |
| >80                                                                       | 12 (6)                | 27 (20)         | .000084.  |
| Days of enrolment after onset of symptoms, median (range)                 | 5                     | 6               | .94868.   |
| N° (%) of healthcare workers                                              | 32/128 (25%)          | 17/128 (13%)    | .0172     |
| N° (%) of subjects with contact with suspected or confirmed COVID-19 case | 82(42%)               | 42(32%)         | .0665     |
| Charlson comorbidity index, median (IQR)                                  | 2 (3)                 | 3 (3)           | .009547.  |
| N° (%) of subjects with underlying chronic disease                        | 103/194 (53)          | 94/130 (71)     | .000516.  |
| With hypertension                                                         | 78/172 (40)           | 62/117 (47)     | .201914.  |
| With cardio-vascular disease                                              | 41/180 (21)           | 35/120 (27)     | .212592.  |
| With diabetes                                                             | 29/182 (15)           | 25/126 (18)     | .375271.  |
| With malignancy                                                           | 16/183 (8)            | 15/120 (12)     | .291268.  |
| With chronic kidney disease                                               | 13/174 (7)            | 14/118 (11)     | .203487   |
| With chronic obstructive pulmonary disease                                | 23/182 (12)           | 26/120 (20)     | .037279.  |
| With liver cirrhosis                                                      | 3/152 (2)             | 3/116 (2)       | .737002.  |
| N° (%) of subjects with                                                   |                       |                 |           |
| Fever                                                                     | 126/138 (64)          | 47/62 (36)      | .003014.  |
| Cough                                                                     | 74/140 (38)           | 32/62 (26)      | .870263.  |
| Dyspnea                                                                   | 50/140 (25)           | 32/62 (26)      | .033816.  |
| hypo ageusia                                                              | 15/102 (8)            | 20/54 (15)      | .001468.  |
| hyposmia                                                                  | 48/109 (24)           | 23/56 (17)      | .715658.  |
| Diarrhea                                                                  | 15/126 (8)            | 8/59 (6)        | .750579.  |
| N° (%) of subjects who died                                               | 6(3)                  | 53 (40)         | .0000     |
